# Supplementary material
Source: PubMed Central journal article supplement (PMC1199022)
Supplement: bmj_38516.649537.E0_1.pdf [file bmj_38516.649537.E0_1.pdf]

## **Supporting Online Materials**

## METHODOLOGICAL APPROACH

### Overview

We used Medicare claims to obtain annual skin biopsy rates for the population age 65 years and older who reside in each of the nine SEER areas. We then use multiple linear regression to explore how biopsy rates relate to the incidence of melanoma in these areas.

### Data

We used Medicare Part B claims to obtain an annual population-based rate of skin biopsy in each of the nine SEER areas from 1986 to 2001. This entailed obtaining claims for the entire state of Connecticut, Hawaii, Iowa, New Mexico and Utah as well as the individual counties that make up the SEER registries in Atlanta, Detroit, San Francisco and Seattle. The numerator was the total number of skin biopsies (CPT code 11100 - single biopsy and CPT code 11101 - multiple biopsies, which includes a field for the total number of biopsies performed); the denominator was the mid-year Medicare Part B entitled population. Medicare beneficiaries under age 65 and those enrolled in risk-contract Health Maintenance Organizations (HMOs) were excluded (in the SEER areas, the proportion of beneficiaries age 65 and older enrolled in HMOs ranged from 14 to 27% during the years analyzed). Because Medicare claims were unavailable for two years (1991, 1992), a total of 14 biopsy rates were calculated for each of the nine SEER areas (N=126).

We used the National Cancer Institute's statistical software (SEER\*Stat, Version 5.3.0) to obtain data on the annual incidence of melanoma in each of the nine SEER areas. The analysis was again restricted to the population age 65 and older. We obtained stage-specific incidence rates using SEER's four historic stages: in-situ, local, regional, and distant. We summed these rates to produce an incidence rate for all stages combined (a small proportion of melanoma is unstaged - ranging from 2% to 6% in any given year). To provide an overview of melanoma trends, we also performed an analysis of the nine SEER areas combined – both on the overall incidence of melanoma and disease-specific mortality (using SEER\*Stat's incidence-based mortality method).

## Analysis

We used multiple linear regression to explore the relationship between biopsy rate (the independent variable of interest) and melanoma rate (the dependent variable). The unit of analysis is the SEER area in an individual year (9 areas, 14 years,  $N = 126$ ). All analyses reported here include an indicator variable for area, which is analogous to performing a panel analysis in which area is modeled as a fixed effect. In a sensitivity analysis, we repeated the analyses modeling area as a random effect - which had little impact on the coefficients reported here. However, because the p values were higher using the fixed effect models, we present the simpler, more conservative analyses.

Our baseline analysis predicts the effect of 1000 additional biopsies on the number of cases of melanoma after controlling for the effect of area. The implicit assumption here is that the true occurrence of melanoma may differ in different areas, but does not change over the period.

Subsequent analyses incorporate the effect of a potential underlying increase in the true occurrence of melanoma. We considered a number of functional forms to model how melanoma might be increasing over time (e.g. exponential, polynomial) and found that linear increase best fit the data (as is evident in Figure 1). To do this, we used year-area interaction terms which allows the melanoma incidence in each area to progress at its own rate (i.e. have its own slope and intercept).

Finally, we performed four stage-specific regressions using the same year-area interaction terms. The only change is that the dependent variable is no longer overall melanoma incidence, but is instead the incidence of a specific stage (i.e. in-situ, local, regional, distant). All analyses were carried out using Stata version 7.0 (College Station, Texas).

The output for the six models appear on the following pages:

**Model #1: No change in true occurrence of disease**

Unit of analysis: SEER area in an individual year (9 areas, 14 years, N = 126)

Dependent variable: melanoma incidence

Independent variable: biopsy rate

Control variables: indicator variables for each of the 9 SEER areas

```
. regress newmel newbx darea1-darea9
```

| Source   | SS         | df  | MS         | Number of obs = | 126    |
|----------|------------|-----|------------|-----------------|--------|
| Model    | 66083.0692 | 9   | 7342.56324 | F( 9, 116) =    | 47.00  |
| Residual | 18121.4057 | 116 | 156.219014 | Prob > F =      | 0.0000 |
| -----    |            |     |            | R-squared =     | 0.7848 |
| -----    |            |     |            | Adj R-squared = | 0.7681 |
| Total    | 84204.4748 | 125 | 673.635799 | Root MSE =      | 12.499 |

| newmel | Coef.     | Std. Err. | t     | P> t  | [95% Conf. Interval] |           |
|--------|-----------|-----------|-------|-------|----------------------|-----------|
| newbx  | 12.62736  | .7088533  | 17.81 | 0.000 | 11.22338             | 14.03133  |
| darea1 | -20.77837 | 5.092681  | -4.08 | 0.000 | -30.86507            | -10.69168 |
| darea2 | .958757   | 4.89135   | 0.20  | 0.845 | -8.729178            | 10.64669  |
| darea3 | -18.51631 | 4.799271  | -3.86 | 0.000 | -28.02187            | -9.010752 |
| darea4 | (dropped) |           |       |       |                      |           |
| darea5 | -12.9332  | 4.747709  | -2.72 | 0.007 | -22.33663            | -3.529763 |
| darea6 | -4.672654 | 4.768985  | -0.98 | 0.329 | -14.11823            | 4.772922  |
| darea7 | -27.66929 | 5.217358  | -5.30 | 0.000 | -38.00293            | -17.33566 |
| darea8 | -.7974728 | 4.860593  | -0.16 | 0.870 | -10.42449            | 8.829543  |
| darea9 | -4.805391 | 5.11005   | -0.94 | 0.349 | -14.92649            | 5.315707  |
| _cons  | 18.84653  | 4.039023  | 4.67  | 0.000 | 10.84673             | 26.84632  |

**Model #2: Increase in true occurrence of disease**

Unit of analysis: SEER area in an individual year (9 areas, 14 years, N = 126)

Dependent variable: melanoma incidence

Independent variable: biopsy rate

Control variables: indicator variables for each of the 9 SEER areas, year-area interaction terms (to allows the melanoma incidence in each area to progress at its own rate)

```
. regress newmel newbx xta1-xta9 darea1-darea9
```

| Source   | SS         | df  | MS         | Number of obs = | 126    |
|----------|------------|-----|------------|-----------------|--------|
| Model    | 77650.6826 | 18  | 4313.92681 | F( 18, 107) =   | 70.43  |
| Residual | 6553.7922  | 107 | 61.2503944 | Prob > F =      | 0.0000 |
|          |            |     |            | R-squared =     | 0.9222 |
|          |            |     |            | Adj R-squared = | 0.9091 |
| Total    | 84204.4748 | 125 | 673.635799 | Root MSE =      | 7.8263 |

| newmel | Coef.     | Std. Err. | t     | P> t  | [95% Conf. Interval] |
|--------|-----------|-----------|-------|-------|----------------------|
| newbx  | 6.93695   | 1.93542   | 3.58  | 0.000 | 3.100207 10.77369    |
| xta1   | .2530607  | .9957486  | 0.25  | 0.800 | -1.720895 2.227016   |
| xta2   | 2.900757  | 1.019757  | 2.84  | 0.005 | .8792077 4.922307    |
| xta3   | 2.302365  | .738589   | 3.12  | 0.002 | .8381983 3.766531    |
| xta4   | 3.560748  | .471876   | 7.55  | 0.000 | 2.625309 4.496187    |
| xta5   | 1.51586   | .6738771  | 2.25  | 0.027 | .1799775 2.851743    |
| xta6   | 1.490887  | .5322862  | 2.80  | 0.006 | .4356917 2.546082    |
| xta7   | .7847641  | .7687463  | 1.02  | 0.310 | -.7391857 2.308714   |
| xta8   | 3.242651  | .7674312  | 4.23  | 0.000 | 1.721308 4.763994    |
| xta9   | 4.835251  | .5399297  | 8.96  | 0.000 | 3.764904 5.905599    |
| darea1 | 6.61444   | 6.421179  | 1.03  | 0.305 | -6.114798 19.34368   |
| darea2 | (dropped) |           |       |       |                      |
| darea3 | -17.60559 | 6.344472  | -2.77 | 0.007 | -30.18276 -5.028414  |
| darea4 | -16.93779 | 6.793498  | -2.49 | 0.014 | -30.40511 -3.470471  |
| darea5 | -8.108062 | 6.270704  | -1.29 | 0.199 | -20.539 4.322877     |
| darea6 | 1.815628  | 7.141718  | 0.25  | 0.800 | -12.342 15.97325     |
| darea7 | -2.441251 | 7.967728  | -0.31 | 0.760 | -18.23634 13.35384   |
| darea8 | -5.758269 | 6.497389  | -0.89 | 0.377 | -18.63858 7.122046   |
| darea9 | -17.30093 | 9.381512  | -1.84 | 0.068 | -35.89868 1.296826   |
| _cons  | 22.72739  | 4.589047  | 4.95  | 0.000 | 13.63014 31.82464    |

**Model #3: Stage-specific analysis - increase in true occurrence of in-situ melanoma**

Unit of analysis: SEER area in an individual year (9 areas, 14 years, N = 126)

Dependent variable: incidence of melanoma in-situ

Independent variable: biopsy rate

Control variables: indicator variables for each of the 9 SEER areas, year-area interaction terms (to allows the melanoma incidence in each area to progress at its own rate).

```
regress insitu newbx xta1-xta9 darea1-darea9
```

| Source   | SS         | df  | MS         | Number of obs = 126 |   |        |
|----------|------------|-----|------------|---------------------|---|--------|
| Model    | 22817.6527 | 18  | 1267.64737 | F( 18, 107)         | = | 55.03  |
| Residual | 2464.61018 | 107 | 23.03374   | Prob > F            | = | 0.0000 |
| -----    |            |     |            | R-squared           | = | 0.9025 |
| -----    |            |     |            | Adj R-squared       | = | 0.8861 |
| Total    | 25282.2629 | 125 | 202.258103 | Root MSE            | = | 4.7993 |

  

| insitu | Coef.     | Std. Err. | t     | P> t  | [95% Conf. Interval] |          |
|--------|-----------|-----------|-------|-------|----------------------|----------|
| newbx  | 4.440318  | 1.186869  | 3.74  | 0.000 | 2.087488             | 6.793148 |
| xta1   | -.7271155 | .6106291  | -1.19 | 0.236 | -1.937616            | .4833854 |
| xta2   | 1.42195   | .625352   | 2.27  | 0.025 | .1822623             | 2.661637 |
| xta3   | .9709697  | .4529295  | 2.14  | 0.034 | .0730898             | 1.86885  |
| xta4   | 1.726939  | .2893714  | 5.97  | 0.000 | 1.153294             | 2.300584 |
| xta5   | .5401914  | .4132459  | 1.31  | 0.194 | -.2790203            | 1.359403 |
| xta6   | .9157183  | .3264172  | 2.81  | 0.006 | .2686343             | 1.562802 |
| xta7   | .5140078  | .471423   | 1.09  | 0.278 | -.4205334            | 1.448549 |
| xta8   | 1.65763   | .4706166  | 3.52  | 0.001 | .7246873             | 2.590572 |
| xta9   | 2.456333  | .3311045  | 7.42  | 0.000 | 1.799957             | 3.112709 |
| darea1 | 10.18095  | 3.9377    | 2.59  | 0.011 | 2.374924             | 17.98698 |
| darea2 | (dropped) |           |       |       |                      |          |
| darea3 | -4.487101 | 3.89066   | -1.15 | 0.251 | -12.19988            | 3.225678 |
| darea4 | .2787841  | 4.166019  | 0.07  | 0.947 | -7.979862            | 8.537431 |
| darea5 | .785105   | 3.845423  | 0.20  | 0.839 | -6.837997            | 8.408207 |
| darea6 | 3.409261  | 4.37956   | 0.78  | 0.438 | -5.272706            | 12.09123 |
| darea7 | .9208387  | 4.886099  | 0.19  | 0.851 | -8.765283            | 10.60696 |
| darea8 | .2797695  | 3.984434  | 0.07  | 0.944 | -7.618906            | 8.178445 |
| darea9 | -4.447645 | 5.753083  | -0.77 | 0.441 | -15.85246            | 6.95717  |
| _cons  | -3.238117 | 2.814169  | -1.15 | 0.252 | -8.81688             | 2.340645 |

### Model #4: Stage-specific analysis - increase in true occurrence of localized melanoma

Unit of analysis: SEER area in an individual year (9 areas, 14 years, N = 126)

Dependent variable: incidence of local stage melanoma

Independent variable: biopsy rate

Control variables: indicator variables for each of the 9 SEER areas, year-area interaction terms (to allows the melanoma incidence in each area to progress at its own rate)

```
. regress local newbx xta1-xta9 darea1-darea9
```

| Source   | SS         | df  | MS         | Number of obs = | 126    |
|----------|------------|-----|------------|-----------------|--------|
| Model    | 11505.2297 | 18  | 639.17943  | F( 18, 107) =   | 29.29  |
| Residual | 2335.19349 | 107 | 21.8242383 | Prob > F =      | 0.0000 |
|          |            |     |            | R-squared =     | 0.8313 |
|          |            |     |            | Adj R-squared = | 0.8029 |
| Total    | 13840.4232 | 125 | 110.723386 | Root MSE =      | 4.6716 |

| localized | Coef.     | Std. Err. | t     | P> t  | [95% Conf. Interval] |
|-----------|-----------|-----------|-------|-------|----------------------|
| newbx     | 2.285205  | 1.155288  | 1.98  | 0.050 | -.0050182 4.575429   |
| xta1      | .5744296  | .5943808  | 0.97  | 0.336 | -.603861 1.75272     |
| xta2      | 1.204351  | .608712   | 1.98  | 0.050 | -.0023497 2.411051   |
| xta3      | .9340952  | .4408775  | 2.12  | 0.036 | .060107 1.808083     |
| xta4      | 1.423739  | .2816715  | 5.05  | 0.000 | .8653578 1.98212     |
| xta5      | .7711066  | .4022498  | 1.92  | 0.058 | -.0263066 1.56852    |
| xta6      | .3918611  | .3177315  | 1.23  | 0.220 | -.2380045 1.021727   |
| xta7      | -.0123884 | .4588789  | -0.03 | 0.979 | -.9220623 .8972856   |
| xta8      | 1.188406  | .4580939  | 2.59  | 0.011 | .280288 2.096524     |
| xta9      | 1.615089  | .3222941  | 5.01  | 0.000 | .9761781 2.253999    |
| darea1    | -.7953597 | 3.832921  | -0.21 | 0.836 | -8.393679 6.80296    |
| darea2    | (dropped) |           |       |       |                      |
| darea3    | -9.157955 | 3.787133  | -2.42 | 0.017 | -16.6655 -1.650405   |
| darea4    | -13.03908 | 4.055165  | -3.22 | 0.002 | -21.07798 -5.000192  |
| darea5    | -8.030129 | 3.7431    | -2.15 | 0.034 | -15.45039 -.6098706  |
| darea6    | -.2851186 | 4.263024  | -0.07 | 0.947 | -8.736067 8.16583    |
| darea7    | -.8678054 | 4.756085  | -0.18 | 0.856 | -10.29619 8.560578   |
| darea8    | -4.10902  | 3.878412  | -1.06 | 0.292 | -11.79752 3.57948    |
| darea9    | -7.672381 | 5.599999  | -1.37 | 0.174 | -18.77372 3.428963   |
| _cons     | 20.08942  | 2.739287  | 7.33  | 0.000 | 14.6591 25.51973     |

**Model #5: Stage-specific analysis - increase in true occurrence of regional melanoma**

Unit of analysis: SEER area in an individual year (9 areas, 14 years, N = 126)

Dependent variable: incidence of regional stage melanoma

Independent variable: biopsy rate

Control variables: indicator variables for each of the 9 SEER areas, year-area interaction terms (to allows the melanoma incidence in each area to progress at its own rate)

```
. regress regional newbx xta1-xta9 darea1-darea9
```

| Source   | SS         | df  | MS         | Number of obs = | 126    |
|----------|------------|-----|------------|-----------------|--------|
| Model    | 513.837762 | 18  | 28.5465423 | F( 18, 107) =   | 10.71  |
| Residual | 285.301697 | 107 | 2.666371   | Prob > F =      | 0.0000 |
|          |            |     |            | R-squared =     | 0.6430 |
|          |            |     |            | Adj R-squared = | 0.5829 |
| Total    | 799.139458 | 125 | 6.39311567 | Root MSE =      | 1.6329 |

| regional | Coef.     | Std. Err. | t     | P> t  | [95% Conf. Interval] |
|----------|-----------|-----------|-------|-------|----------------------|
| newbx    | .3066664  | .4038136  | 0.76  | 0.449 | -.493847 1.10718     |
| xta1     | .3028194  | .2077569  | 1.46  | 0.148 | -.1090345 .7146733   |
| xta2     | .1121469  | .2127662  | 0.53  | 0.599 | -.3096372 .5339311   |
| xta3     | .2522026  | .1541021  | 1.64  | 0.105 | -.0532869 .5576921   |
| xta4     | .3217822  | .0984541  | 3.27  | 0.001 | .1266084 .5169559    |
| xta5     | .2061461  | .1406004  | 1.47  | 0.146 | -.0725778 .48487     |
| xta6     | .0914983  | .1110583  | 0.82  | 0.412 | -.1286619 .3116584   |
| xta7     | .2084553  | .1603943  | 1.30  | 0.197 | -.1095077 .5264182   |
| xta8     | .2826096  | .1601199  | 1.76  | 0.080 | -.0348094 .6000286   |
| xta9     | .5349786  | .1126531  | 4.75  | 0.000 | .311657 .7583002     |
| darea1   | -2.749485 | 1.33974   | -2.05 | 0.043 | -5.405364 -.0936065  |
| darea2   | (dropped) |           |       |       |                      |
| darea3   | -3.583627 | 1.323736  | -2.71 | 0.008 | -6.207779 -.9594756  |
| darea4   | -4.236004 | 1.417422  | -2.99 | 0.003 | -7.045879 -1.42613   |
| darea5   | -2.081836 | 1.308345  | -1.59 | 0.115 | -4.675477 .5118044   |
| darea6   | -1.795236 | 1.490076  | -1.20 | 0.231 | -4.749138 1.158667   |
| darea7   | -2.834087 | 1.662418  | -1.70 | 0.091 | -6.129637 .4614638   |
| darea8   | -1.950981 | 1.355641  | -1.44 | 0.153 | -4.638381 .7364189   |
| darea9   | -4.559081 | 1.957396  | -2.33 | 0.022 | -8.43939 -.6787718   |
| _cons    | 4.562358  | .9574769  | 4.76  | 0.000 | 2.664272 6.460444    |



**Model #6: Stage-specific analysis - increase in true occurrence of distant melanoma**

Unit of analysis: SEER area in an individual year (9 areas, 14 years, N = 126)

Dependent variable: incidence of distant stage melanoma

Independent variable: biopsy rate

Control variables: indicator variables for each of the 9 SEER areas, year-area interaction terms (to allows the melanoma incidence in each area to progress at its own rate)

```
. regress distant newbx xta1-xta9 darea1-darea9
```

| Source   | SS         | df  | MS         | Number of obs = | 126    |
|----------|------------|-----|------------|-----------------|--------|
| Model    | 38.4588807 | 18  | 2.13660448 | F( 18, 107) =   | 2.46   |
| Residual | 93.0681829 | 107 | .869796102 | Prob > F =      | 0.0023 |
|          |            |     |            | R-squared =     | 0.2924 |
|          |            |     |            | Adj R-squared = | 0.1734 |
| Total    | 131.527064 | 125 | 1.05221651 | Root MSE =      | .93263 |

| distant | Coef.     | Std. Err. | t     | P> t  | [95% Conf. Interval] |
|---------|-----------|-----------|-------|-------|----------------------|
| newbx   | -.09524   | .2306372  | -0.41 | 0.680 | -.5524514 .3619714   |
| xta1    | .1029275  | .1186599  | 0.87  | 0.388 | -.1323019 .3381569   |
| xta2    | .1623099  | .1215209  | 1.34  | 0.184 | -.0785911 .403211    |
| xta3    | .1450973  | .0880151  | 1.65  | 0.102 | -.0293823 .319577    |
| xta4    | .088288   | .0562318  | 1.57  | 0.119 | -.0231851 .199761    |
| xta5    | -.0015836 | .0803036  | -0.02 | 0.984 | -.1607761 .1576089   |
| xta6    | .0918095  | .0634307  | 1.45  | 0.151 | -.0339344 .2175535   |
| xta7    | .0746895  | .0916088  | 0.82  | 0.417 | -.1069143 .2562933   |
| xta8    | .114006   | .0914521  | 1.25  | 0.215 | -.0672871 .2952991   |
| xta9    | .2288518  | .0643416  | 3.56  | 0.000 | .1013022 .3564014    |
| darea1  | -.021669  | .7651896  | -0.03 | 0.977 | -1.538568 1.49523    |
| darea2  | (dropped) |           |       |       |                      |
| darea3  | -.3769055 | .7560487  | -0.50 | 0.619 | -1.875684 1.121873   |
| darea4  | .0585161  | .8095576  | 0.07  | 0.943 | -1.546337 1.66337    |
| darea5  | 1.218797  | .7472581  | 1.63  | 0.106 | -.2625546 2.700149   |
| darea6  | .4867213  | .8510538  | 0.57  | 0.569 | -1.200393 2.173836   |
| darea7  | .3398033  | .9494865  | 0.36  | 0.721 | -1.542443 2.222049   |
| darea8  | .0219624  | .7742713  | 0.03  | 0.977 | -1.51294 1.556865    |
| darea9  | -.62182   | 1.117962  | -0.56 | 0.579 | -2.83805 1.59441     |
| _cons   | 1.313729  | .5468607  | 2.40  | 0.018 | .229641 2.397816     |
